# Supplementary material for: Transcriptome analysis of bread wheat leaves in response to salt stress
Source: PLoS One. 2021 Jul 9;16(7):e0254189. doi: 10.1371/journal.pone.0254189 (PMC8270127; doi:10.1371/journal.pone.0254189)
Supplement: S8 Table — (XLSX) [file pone.0254189.s015.xlsx]

## Sheet: Sheet1
S8 Table. KEGG pathway classification of the DEGs
Ko number	Pathway_description	Sequence number
ko09101	Carbohydrate metabolism
ko00010	Glycolysis / Gluconeogenesis	36
ko00020	Citrate cycle	9
ko00030	Pentose phosphate pathway	17
ko00040	Pentose and glucuronate interconversions	15
ko00051	Fructose and mannose metabolism	11
ko00052	Galactose metabolism	31
ko00053	Ascorbate and aldarate metabolism	16
ko00500	Starch and sucrose metabolism	50
ko00520	Amino sugar and nucleotide sugar metabolism	30
ko00620	Pyruvate metabolism	23
ko00630	Glyoxylate and dicarboxylate metabolism	47
ko00640	Propanoate metabolism	8
ko00650	Butanoate metabolism	5
ko00562	Inositol phosphate metabolism	7
ko09102	Energy metabolism
ko00190	Oxidative phosphorylation	10
ko00195	Photosynthesis	27
ko00196	Photosynthesis - antenna proteins	21
ko00194	Photosynthesis proteins	48
ko00710	Carbon fixation in photosynthetic organisms	38
ko00720	Carbon fixation pathways in prokaryotes	9
ko00680	Methane metabolism	18
ko00910	Nitrogen metabolism	17
ko00920	Sulfur metabolism	15
ko09103	Lipid metabolism
ko00061	Fatty acid biosynthesis	4
ko00062	Fatty acid elongation	11
ko00071	Fatty acid degradation	12
ko00072	Synthesis and degration of ketone bodies	1
ko00073	Cutin, suberine and wax biosynthesis	7
ko00100	Steroid biosynthesis	7
ko00120	Primary bile acid biosynthesis	1
ko00561	Glycerolipid metabolism	18
ko00564	Glycerophospholipid metabolism	17
ko00565	Ether lipid metabolism	5
ko00600	Sphingolipid metabolism	5
ko00590	Arachidonic acid metabolism	3
ko00591	Linoleic acid metabolism	14
ko00592	alpha-Linolenic acid metabolism	20
ko01040	Biosynthesis of unsaturated fatty acids	4
ko01004	Lipid biosynthesis proteins	6
ko09104	Nucleotide metabolism
ko00230	Purine metabolism	17
ko00240	Pyrimidine metabolism	14
ko09105	Amino acid metabolism
ko00250	Alanine, aspartate and glutamate metabolis	17
ko00260	Glycine, serine and threonine metabolism	33
ko00270	Cysteine and methionine metabolism	42
ko00280	Valine, leucine and isoleucine degradation	22
ko00290	Valine, leucine and isoleucine biosynthesis	3
ko00300	Lysine biosynthesis	4
ko00310	Lysine degradation	14
ko00220	Arginine biosynthesis	8
ko00330	Arginine and proline metabolism	33
ko00340	Histidine metabolism	7
ko00350	Tyrosine metabolism	11
ko00360	Phenylalanine metabolism	50
ko00380	Tryptophan metabolism	25
ko00400	Phenylalanine, tyrosine and tryptophan biosynthesis	11
ko01007	Amino acid related enzymes	11
ko09106	Metabolism of other amino acids
ko00410	beta-Alanine metabolism	21
ko00430	Taurine and hypotaurine metabolism	9
ko00440	Phosphonate and phosphinate metabolism	3
ko00450	Selenocompound metabolism	11
ko00460	Cyanoamino acid metabolism	16
ko00471	D-Glutamine and D-glutamate metabolism	2
ko00480	Glutathione metabolism	26
ko09107	Glycan biosynthesis and metabolism
ko01003	Glycosyltransferases	77
ko00537	Glycosylphosphatidylinositol (GPI)-anchored proteins	6
ko00531	Glycosaminoglycan degredation	2
ko00603	Glycosphingolipid biosynthesis - globo and isoglobo series	2
ko00604	Glycosphingolipid biosynthesis -ganglio series	1
ko00540	Lipopolysaccharide biosynthesisLipopolysaccharide biosynthesis	1
ko01005	Lipopolysaccharide biosynthesis proteins	1
ko00511	Other glycan degradation	5
ko09108	Metabolism of cofactors and vitamins
ko00730	Thiamine metabolism	4
ko00740	Riboflavin metabolism	6
ko00750	Vitamin B6 metabolism	2
ko00760	Nicotinate and nicotinamide metabolism	3
ko00770	Pantothenate and CoA biosynthesis	5
ko00780	Biotin metabolism	2
ko00790	Folate biosynthesis	4
ko00670	One carbon pool by folate	7
ko00830	Retinol metabolism	2
ko00860	Porphyrin and chlorophyll metabolism	11
ko00130	Ubiquinone and other terpenoid-quinone biosynthesis	12
ko09109	Metabolism of terpenoids and polyketides
ko01006	Prenyltransferases	9
ko00900	Terpenoid backbone biosynthesis	8
ko00902	Monoterpenoid biosynthesis	2
ko00909	Sesquiterpenoid and triterpenoid biosynthesis	2
ko00904	Diterpenoid biosynthesis	3
ko00906	Carotenoid biosynthesis	11
ko00905	Brassinosteroid biosynthesis	3
ko00981	Insect hormone biosynthesis	4
ko00908	Zeatin biosynthesis	5
ko00903	Limonene and pinene degradation	4
ko01008	Polyketide biosynthesis proteins	4
ko01051]	Biosynthesis of ansamycins	1
ko09110	Biosynthesis of other secondary metabolites
ko00940	Phenylpropanoid biosynthesis	140
ko00945	Stilbenoid, diarylheptanoid and gingerol biosynthesis	23
ko00941	Flavonoid biosynthesis	38
ko00944	Flavone and flavonol biosynthesis	9
ko00901	Indole alkaloid biosynthesis	7
ko00950	Isoquinoline alkaloid biosynthesis	6
ko00960	Tropane, piperidine and pyridine alkaloid biosynthesis	8
ko00965	Betalain biosynthesis	4
ko00966	Glucosinolate biosynthesis	5
ko00521	Streptomycin biosynthesis	3
ko00401	Novobiocin biosynthesis	1
ko00333	Prodigiosin biosyntheses	2
ko09111	Xenobiotics biodegradation and metabolism
ko00362	Benzoate degradation	1
ko00627	Aminobenzoate degradation	1
ko00625	Chloroalkane and chloroalkene degradation	6
ko00643	Styrene degradation	1
ko00626	Naphthalene degradation	2
ko00980	Metabolism of xenobiotics by cytochrome P450	23
ko00982	Drug metabolism - cytochrome P450	23
ko00983	Drug metabolism - other enzymes	2
ko09112	Enzyme families
ko01001	Protein kinases	29
ko01009	Protein phosphatase and associated proteins	29
ko01002	Peptidases	57
ko00199	Cytochrome P450	57
ko09120	Genetic Information Processing
ko09121	Transcription
ko03020	RNA polymerase	2
ko03000	Transcription factors	92
ko03021	Transcription machinery	4
ko03040	Spliceosome	3
ko03041	Spliceosome	5
9122	Translation
ko03010	Ribosome	7
ko03011	Ribosome	7
ko03016	Transfer RNA biogenesis	10
ko03013	RNA transport	2
ko03015	mRNA surveillance pathway	8
ko03019	Messenger RNA Biogenesis	16
ko03009	Ribosome biogenesis	7
ko03029	Mitochondrial biogenesis	18
ko03012	Translation factors	11
ko09123	Folding, sorting and degradation
ko03110	Chaperones and folding catalysts	20
ko03060	Protein export	1
ko04141	Protein processing in endoplasmic reticulum	16
ko04131	Membrane trafficking	26
ko04120	Ubiquitin mediated proteolysis	4
ko04121	Ubiquitin system	27
ko03050	Proteasome	2
ko03051	Proteasome	5
ko03018	RNA degradation	3
ko09124	Replication and repair
ko03030	DNA replication	1
ko03032	DNA replication protein	1
ko03036	Chromosome and associated proteins	40
ko03420	Nucleotide excision repair	1
ko03430	Mismatch repair	1
ko03440	Homologous recombination	1
ko03450	Non-homologous end-joining	1
ko03460	Fanconi anemia pathway	1
ko03400	DNA repair and recombination proteins	7
ko09130	Environmental Information Processing
ko09131	Membrane transport
ko02000	Transporters	136
ko02010	ABC transporters	3
ko03070	Bacterial secretion system	1
ko02044	Secretion system	1
ko09132	Signal transduction
ko02020	Two-component system	4
ko04014	Ras signaling pathway	7
ko04015	Rap1 signaling pathway	7
ko04010	MAPK signaling pathway	3
ko04013	MAPK signaling pathway - fly	8
ko04016	MAPK signaling pathway - plan	64
ko04011	MAPK signaling pathway - yeast	4
ko04390	Hippo signaling pathway	2
ko04391	Hippo signaling pathway -fly	1
ko04371	Apelin signaling pathway	7
ko04064	NF-kappa B signaling pathway	1
ko04066	HIF-1 signaling pathway	8
ko04068	FoxO signaling pathway	3
ko04020	Calcium signaling pathway	8
ko04070	Phosphatidylinositol signaling system	11
ko04072	Phospholipase D signaling pathway	5
ko04071	Sphingolipid signaling pathway	1
ko04024	cAMP signaling pathway	5
ko04022	cGMP - PKG signaling pathway	9
ko04151	PI3K-Akt signaling pathway	2
ko04152	AMPK signaling pathway	6
ko04150	mTOR signaling pathway	1
ko04075	Plant hormone signal transduction	87
ko09133	Signaling molecules and interaction
ko04030	G protein-coupled receptors	2
ko04040	Ion channels	10
ko04031	GTP-binding proteins	2
ko04516	Cell adhesion molecules and their ligands	2
ko04090	CD Molecules	3
ko09140	Cellular Processes
ko09141	Transport and catabolism
ko04144	Endocytosis	7
ko04147	Exosome	73
ko04145	Phagosome	7
ko04142	Lysosome	14
ko04146	Peroxisome	10
ko04140	Autophagy - anima	4
ko04138	Autophagy - yeast	1
ko04139	Mitophagy - yeast	2
ko09143	Cell growth and death
ko04110	Cell cycle	1
ko04113	Meiosis - yeast	2
ko04114	Oocyte meiosis	6
ko04210	Apoptosis	5
ko04216	Ferroptosis	1
ko04217	Necroptosis	10
ko04115	p53 signaling pathway	2
ko04218	Cellular senescence	9
ko09144	Cellular community - eukaryotes
ko04510	Focal adhesion	2
ko04520	Adherens junction	1
ko04530	Tight junction	1
ko04540	Gap junction	2
ko09145	Cellular community - prokaryotes
ko02024	Quorum sensing	8
ko05111	Biofilm formation - Vibrio cholerae	1
ko09142	Cell motility
ko04810	Regulation of actin cytoskeleton	9
ko04812	Cytoskeleton proteins	21
ko09150	Organismal Systems
KO09151	Immune system
PATH:ko04611	Platelet activation	2
PATH:ko04620	Toll-like receptor signaling pathway	1
PATH:ko04624	Toll and Imd signaling pathway	3
PATH:ko04621	NOD-like receptor signaling pathway	4
PATH:ko04612	Antigen processing and presentation	13
PATH:ko04659	Th17 cell differentiation	1
PATH:ko04657	IL-17 signaling pathway	2
PATH:ko04666	Fc gamma R-mediated phagocytosis	5
PATH:ko04670	Leukocyte transendothelial migration	1
ko09152	Endocrine system
PATH:ko04910	Insulin signaling pathway	7
PATH:ko04922	Glucagon signaling pathway	8
ATH:ko04923	Regulation of lipolysis in adipocyte	1
PATH:ko03320	PPAR signaling pathway	2
PATH:ko04912	GnRH signaling pathway	4
PATH:ko04915	Estrogen signaling pathway	7
PATH:ko04914	Progesterone-mediated oocyte maturation	1
PATH:ko04921	Oxytocin signaling pathway	5
PATH:ko04919	Thyroid hormone signaling pathway	1
PATH:ko04916	Melanogenesis	5
PATH:ko04924	Renin secretion	4
PATH:ko04614	Renin-angiotensin system	3
PATH:ko04925	Aldosterone synthesis and secretion	4
PATH:ko04261	Adrenergic signaling in cardiomyocyte	6
PATH:ko04270	Vascular smooth muscle contraction	8
ko09153	Circulatory system
PATH:ko04261	Adrenergic signaling in cardiomyocytes
PATH:ko04270	Vascular smooth muscle contraction
ko09154	Digestive system
PATH:ko04970	Salivary secretion	4
PATH:ko04971	Gastric acid secretion	4
PATH:ko04972	Pancreatic secretion	3
PATH:ko04976	Bile secretion	4
PATH:ko04973	Carbohydrate digestion and absorption	1
PATH:ko04974	Protein digestion and absorption	3
PATH:ko04975	Fat digestion and absorption	3
ko09155	Excretory system
PATH:ko04964	Proximal tubule bicarbonate reclamation	2
ko09156	Nervous system
PATH:ko04724	Glutamatergic synapse	5
PATH:ko04727	GABAergic synapse	13
PATH:ko04728	Dopaminergic synapse	6
PATH:ko04720	Long-term potentiation	5
PATH:ko04723	Retrograde endocannabinoid signaling	8
PATH:ko04721	Synaptic vesicle cycle	7
PATH:ko04722	Neurotrophin signaling pathway	5
ko09157	Sensory system
PATH:ko04744	Phototransduction	4
PATH:ko04745	Phototransduction - fly	5
PATH:ko04740	Olfactory transduction	4
PATH:ko04750	Inflammatory mediator regulation of TRP channels	5
ko09157	Development
PATH:ko04360	Axon guidance	2
PATH:ko04380	Osteoclast differentiation	3
ko09149	Aging
PATH:ko04211	Longevity regulating pathway - mammal	3
PATH:ko04212	Longevity regulating pathway - worm	8
PATH:ko04213	Longevity regulating pathway - multiple species	7
ko09159	Environmental adaptation
PATH:ko04713	Circadian entrainment	4
PATH:ko04712	Circadian rhythm - plant	5
PATH:ko04626	Plant-pathogen interaction	31
