# Supplementary material for: Transcriptome analysis of bread wheat leaves in response to salt stress
Source: PLoS One. 2021 Jul 9;16(7):e0254189. doi: 10.1371/journal.pone.0254189 (PMC8270127; doi:10.1371/journal.pone.0254189)
Supplement: S10 Table — (XLSX) [file pone.0254189.s017.xlsx]

## Sheet: Sheet1
	S10 Table. The genes applied in the model
Row number	Gene ID or gene location	Gene name in the model
1	TGACv1_scaffold_062156_1DL:54227-54851	Ta.ACA7
2	TRIAE_CS42_U_TGACv1_642275_AA2114800	Ta.GLR
3	TRIAE_CS42_5AL_TGACv1_376286_AA1234920	Ta.GLR
4	TRIAE_CS42_5BL_TGACv1_407437_AA1356880	Ta.GLR
5	TRIAE_CS42_5DL_TGACv1_432944_AA1395510	Ta.GLR
6	TRIAE_CS42_6DL_TGACv1_526595_AA1687820	Ta.GLR
7	TRIAE_CS42_7AS_TGACv1_570947_AA1842840	Ta.GLR
8	TRIAE_CS42_4AL_TGACv1_288973_AA0962350	Ta.CIPK
9	TRIAE_CS42_1DS_TGACv1_081780_AA0262690	Ta.CIPK
10	TRIAE_CS42_4DL_TGACv1_343506_AA1135580	Ta.CIPK
11	TRIAE_CS42_2DL_TGACv1_158556_AA0521800	Ta.CIPK
12	TGACv1_scaffold_061773_1DL:80296-83890	Ta.CIPK
13	TRIAE_CS42_2BS_TGACv1_146593_AA0468910	Ta.CIPK
14	TRIAE_CS42_4AS_TGACv1_306509_AA1009420	Ta.CIPK
15	TRIAE_CS42_4DL_TGACv1_342497_AA1115230	Ta.CIPK
16	TGACv1_scaffold_424866_5BS:11831-12936	Ta.CIPK
17	TRIAE_CS42_5DL_TGACv1_433934_AA1425570	Ta.CIPK
18	TRIAE_CS42_U_TGACv1_644432_AA2139480	Ta.CIPK
19	TRIAE_CS42_5AL_TGACv1_375277_AA1218980	Ta.CIPK
20	TRIAE_CS42_U_TGACv1_644157_AA2137680	Ta.CIPK
21	TRIAE_CS42_5AL_TGACv1_375888_AA1228470	Ta.CaM
22	TRIAE_CS42_1BL_TGACv1_033492_AA0139870	Ta.MLO
23	TRIAE_CS42_1DL_TGACv1_061397_AA0194170	Ta.MLO
24	TRIAE_CS42_5DS_TGACv1_456511_AA1472690	Ta.CBP60
25	TRIAE_CS42_5DS_TGACv1_457432_AA1486480	Ta.CBP60
26	TRIAE_CS42_3AS_TGACv1_212070_AA0697370	Ta.GLIP
27	TRIAE_CS42_3DS_TGACv1_272149_AA0915720	Ta.GLIP
28	TRIAE_CS42_3DS_TGACv1_272149_AA0915730	Ta.GLIP
29	TRIAE_CS42_6AL_TGACv1_474118_AA1534150	Ta.GLIP
30	TRIAE_CS42_7DL_TGACv1_604239_AA1995620	Ta.GLIP
31	TRIAE_CS42_5BL_TGACv1_410683_AA1367160	Ta.WAK
32	TRIAE_CS42_5AS_TGACv1_392782_AA1264560	Ta.WAK
33	TRIAE_CS42_3DL_TGACv1_252879_AA0892450	Ta.WAK
34	TGACv1_scaffold_343961_4DL:7987-9125	Ta.WAK
35	TRIAE_CS42_5DL_TGACv1_432912_AA1393960	Ta.WAK
36	TRIAE_CS42_3AL_TGACv1_194557_AA0635760	Ta.WAK
37	TRIAE_CS42_2DS_TGACv1_179729_AA0608810	Ta. LecRLK
38	TRIAE_CS42_5BS_TGACv1_423196_AA1370270	Ta. LecRLK
39	TRIAE_CS42_7AL_TGACv1_557989_AA1788740	Ta. LecRLK
40	TRIAE_CS42_1AL_TGACv1_001596_AA0032670	Ta.MPK
41	TRIAE_CS42_7BL_TGACv1_576902_AA1859240	Ta.MPK
42	TGACv1_scaffold_329491_4BS:24288-25456	Ta.MPK
43	TRIAE_CS42_7BL_TGACv1_577270_AA1870750	Ta.MPK
44	TRIAE_CS42_1BL_TGACv1_032512_AA0130820	Ta.MPK
45	TRIAE_CS42_4BL_TGACv1_320561_AA1043350	Ta.MPK
46	TRIAE_CS42_3B_TGACv1_224905_AA0803000	Ta.MYB
47	TRIAE_CS42_6BS_TGACv1_513228_AA1635240	Ta.MYB
48	TRIAE_CS42_6DS_TGACv1_543930_AA1745410	Ta.MYB
49	TGACv1_scaffold_393869_5AS:14147-15040	Ta.MYB
50	TRIAE_CS42_4AL_TGACv1_288542_AA0951740	Ta.MYB
51	TRIAE_CS42_4DL_TGACv1_343285_AA1132700	Ta.MYB
52	TRIAE_CS42_2BS_TGACv1_146319_AA0462520	Ta.MYB
53	TRIAE_CS42_1AL_TGACv1_002296_AA0040650	Ta.MYB
54	TRIAE_CS42_1AL_TGACv1_002859_AA0045630	Ta.MYB
55	TRIAE_CS42_1BL_TGACv1_030624_AA0096110	Ta.MYB
56	TRIAE_CS42_1BL_TGACv1_030624_AA0096150	Ta.MYB
57	TRIAE_CS42_1BL_TGACv1_030624_AA0096170	Ta.MYB
58	TRIAE_CS42_1BL_TGACv1_030624_AA0096150	Ta.MYB
59	TRIAE_CS42_1DL_TGACv1_061664_AA0201300	Ta.MYB
60	TRIAE_CS42_1DL_TGACv1_062639_AA0217590	Ta.MYB
61	TRIAE_CS42_1DL_TGACv1_062639_AA0217600	Ta.MYB
62	TRIAE_CS42_1DL_TGACv1_062692_AA0218230	Ta.MYB
63	TRIAE_CS42_3AL_TGACv1_194291_AA0630500	Ta.MYB
64	TRIAE_CS42_3DL_TGACv1_249637_AA0853040	Ta.MYB
65	TRIAE_CS42_2BL_TGACv1_130862_AA0418960	Ta.MYB
66	TRIAE_CS42_2BL_TGACv1_129283_AA0376500	Ta.MYB
67	TRIAE_CS42_3AS_TGACv1_210712_AA0677520	Ta.MYB
68	TRIAE_CS42_3B_TGACv1_225700_AA0811240	Ta.MYB
69	TRIAE_CS42_3DS_TGACv1_271905_AA0910670	Ta.MYB
70	TRIAE_CS42_2AS_TGACv1_112092_AA0330020	Ta.MYB
71	TRIAE_CS42_2BS_TGACv1_147267_AA0480800	Ta.MYB
72	TRIAE_CS42_2DS_TGACv1_179425_AA0607060	Ta.MYB
73	TRIAE_CS42_1BL_TGACv1_032488_AA0130420	Ta.bZIP
74	TRIAE_CS42_4BS_TGACv1_330275_AA1106870	Ta.bZIP
75	TRIAE_CS42_2AL_TGACv1_094574_AA0299820	Ta.ZFP
76	TRIAE_CS42_3B_TGACv1_222185_AA0759270	Ta.ZFP
77	TRIAE_CS42_5AS_TGACv1_393239_AA1270200	Ta.ZFP
78	TRIAE_CS42_5DS_TGACv1_457051_AA1481540	Ta.ZFP
79	TRIAE_CS42_6BL_TGACv1_500192_AA1600940	Ta.ZFP
80	TRIAE_CS42_6DL_TGACv1_526384_AA1681470	Ta.ZFP
81	TRIAE_CS42_5BL_TGACv1_408301_AA1362710	Ta.ZFP
82	TRIAE_CS42_5DL_TGACv1_433085_AA1401310	Ta.ZFP
83	TRIAE_CS42_U_TGACv1_641916_AA2107200	Ta.ZFP
84	TRIAE_CS42_7DL_TGACv1_603248_AA1979080	Ta.ZFP
85	TRIAE_CS42_4AL_TGACv1_291136_AA0992390	Ta.ZFP
86	TRIAE_CS42_4BS_TGACv1_328900_AA1095280	Ta.ZFP
87	TRIAE_CS42_4DS_TGACv1_361925_AA1174360	Ta.ZFP
88	TRIAE_CS42_3DL_TGACv1_249236_AA0842580	Ta.ZFP
89	TRIAE_CS42_4AL_TGACv1_289316_AA0969030	Ta.ZFP
90	TRIAE_CS42_4BS_TGACv1_327904_AA1078220	Ta.ZFP
91	TRIAE_CS42_4DS_TGACv1_361895_AA1173980	Ta.ZFP
46	TRIAE_CS42_5AL_TGACv1_379331_AA1256080	Ta. JAZ
47	TRIAE_CS42_5BL_TGACv1_408035_AA1361270	Ta. JAZ
48	TRIAE_CS42_5AL_TGACv1_373966_AA1185670	Ta.WRKY
49	TRIAE_CS42_5BL_TGACv1_406163_AA1341560	Ta.WRKY
50	TRIAE_CS42_5BL_TGACv1_407645_AA1358580	Ta.WRKY
51	TRIAE_CS42_5DL_TGACv1_432937_AA1395210	Ta.WRKY
52	TRIAE_CS42_5DL_TGACv1_436840_AA1463530	Ta.WRKY
53	TRIAE_CS42_5AL_TGACv1_376168_AA1233160	Ta.WRKY
54	TRIAE_CS42_5BL_TGACv1_405915_AA1337580	Ta.WRKY
55	TRIAE_CS42_5DL_TGACv1_433109_AA1402330	Ta.WRKY
56	TRIAE_CS42_2BS_TGACv1_146003_AA0452670	Ta.WRKY
57	TRIAE_CS42_2BS_TGACv1_146003_AA0452680	Ta.WRKY
58	TRIAE_CS42_2DS_TGACv1_179236_AA0605510	Ta.WRKY
59	TRIAE_CS42_4BL_TGACv1_320860_AA1050450	Ta.WRKY
60	TRIAE_CS42_4DL_TGACv1_343709_AA1138480	Ta.WRKY
61	TRIAE_CS42_7AL_TGACv1_556459_AA1763560	Ta.WRKY
62	TRIAE_CS42_7DL_TGACv1_602597_AA1962010	Ta.WRKY
63	TRIAE_CS42_7AS_TGACv1_570344_AA1834180	Ta.WRKY
64	TRIAE_CS42_1AL_TGACv1_002725_AA0044760	Ta.WRKY
65	TRIAE_CS42_1AL_TGACv1_002725_AA0044780	Ta.WRKY
66	TRIAE_CS42_3DL_TGACv1_250121_AA0862420	Ta.WRKY
67	TRIAE_CS42_6BS_TGACv1_513502_AA1643690	Ta.WRKY
68	TRIAE_CS42_2AL_TGACv1_094444_AA0297600	Ta.WRKY
69	TRIAE_CS42_2BL_TGACv1_130658_AA0415490	Ta.WRKY
70	TRIAE_CS42_2DL_TGACv1_158819_AA0526620	Ta.WRKY
71	TRIAE_CS42_1AS_TGACv1_019570_AA0068550	Ta.WRKY
72	TRIAE_CS42_1BS_TGACv1_050906_AA0176590	Ta.WRKY
73	TRIAE_CS42_1DS_TGACv1_080209_AA0243170	Ta.WRKY
74	TRIAE_CS42_1AL_TGACv1_000249_AA0007270	Ta.WRKY
75	TRIAE_CS42_1AL_TGACv1_002051_AA0038150	Ta.WRKY
76	TRIAE_CS42_1BL_TGACv1_031241_AA0110230	Ta.WRKY
77	TRIAE_CS42_1BL_TGACv1_032201_AA0126620	Ta.WRKY
78	TRIAE_CS42_1DL_TGACv1_061434_AA0195250	Ta.WRKY
79	TRIAE_CS42_5BL_TGACv1_405234_AA1322970	Ta.NAC
80	TRIAE_CS42_5DL_TGACv1_436785_AA1463200	Ta.NAC
81	TRIAE_CS42_7AL_TGACv1_556250_AA1759120	Ta.NAC
82	TRIAE_CS42_7BL_TGACv1_577855_AA1884660	Ta.NAC
83	TRIAE_CS42_7DL_TGACv1_604393_AA1997730	Ta.NAC
84	TRIAE_CS42_2AS_TGACv1_112832_AA0345940	Ta.NAC
85	TRIAE_CS42_2AS_TGACv1_113086_AA0351020	Ta.NAC
86	TRIAE_CS42_2DS_TGACv1_177687_AA0582480	Ta.NAC
87	TRIAE_CS42_4AL_TGACv1_288222_AA0941150	Ta.NAC
88	TRIAE_CS42_4AL_TGACv1_288367_AA0946570	Ta.NAC
89	TRIAE_CS42_4AL_TGACv1_288367_AA0946600	Ta.NAC
90	TRIAE_CS42_4AL_TGACv1_289844_AA0977690	Ta.NAC
91	TRIAE_CS42_4AL_TGACv1_289844_AA0977700	Ta.NAC
92	TRIAE_CS42_4AL_TGACv1_292332_AA0998470	Ta.NAC
93	TRIAE_CS42_7DS_TGACv1_621783_AA2026010	Ta.NAC
94	TRIAE_CS42_7DS_TGACv1_622066_AA2032070	Ta.NAC
95	TRIAE_CS42_7DS_TGACv1_622629_AA2042860	Ta.NAC
96	TRIAE_CS42_U_TGACv1_644928_AA2142300	Ta.NAC
97	TRIAE_CS42_2BL_TGACv1_129453_AA0384490	Ta.NAC
98	TRIAE_CS42_3B_TGACv1_224197_AA0793760	Ta.NAC
99	TRIAE_CS42_5AL_TGACv1_377220_AA1245090	Ta.NAC
100	TRIAE_CS42_3AL_TGACv1_195139_AA0645220	Ta.NAC
101	TRIAE_CS42_3B_TGACv1_221306_AA0736740	Ta.NAC
102	TRIAE_CS42_3DL_TGACv1_249186_AA0840740	Ta.NAC
103	TRIAE_CS42_5AL_TGACv1_376003_AA1230550	Ta.NAC
104	TRIAE_CS42_3DS_TGACv1_272250_AA0917810	Ta.NAC
105	TRIAE_CS42_3DS_TGACv1_272946_AA0926870	Ta.NAC
106	TRIAE_CS42_2DS_TGACv1_177294_AA0572540	Ta.NAC
107	TRIAE_CS42_7BS_TGACv1_593422_AA1951400	Ta.ERF
108	TRIAE_CS42_1AL_TGACv1_000567_AA0014790	Ta.ERF
109	TRIAE_CS42_4BL_TGACv1_320969_AA1052810	Ta.ERF
110	TRIAE_CS42_U_TGACv1_643085_AA2127120	Ta.ERF
111	TRIAE_CS42_5AL_TGACv1_374826_AA1209700	Ta.ERF
112	TRIAE_CS42_4BS_TGACv1_329268_AA1099450	Ta.ERF
113	TRIAE_CS42_4DS_TGACv1_362027_AA1175790	Ta.ERF
114	TRIAE_CS42_3B_TGACv1_225151_AA0805500	Ta.ERF
115	TRIAE_CS42_4AL_TGACv1_288513_AA0950680	Ta.ERF
116	TRIAE_CS42_1BL_TGACv1_031346_AA0112090	Ta.ERF
117	TRIAE_CS42_1BL_TGACv1_032814_AA0134350	Ta.ERF
118	TRIAE_CS42_7DS_TGACv1_623962_AA2057840	Ta.ERF
119	TRIAE_CS42_3AL_TGACv1_193584_AA0613780	Ta.ERF
120	TRIAE_CS42_7BS_TGACv1_592530_AA1939910	Ta.ERF
121	TRIAE_CS42_3DL_TGACv1_252924_AA0892640	Ta.ERF
122	TRIAE_CS42_2BL_TGACv1_129818_AA0397160	Ta.HOX
123	TRIAE_CS42_2DL_TGACv1_161464_AA0558720	Ta.HOX
124	TRIAE_CS42_1BL_TGACv1_032445_AA0129920	Ta.HOX
125	TRIAE_CS42_2DL_TGACv1_157944_AA0502880	Ta.HKT1
126	TRIAE_CS42_2BL_TGACv1_130461_AA0411910	Ta.HKT4
127	TRIAE_CS42_5AL_TGACv1_374155_AA1191930	Ta.KT
128	TRIAE_CS42_7AL_TGACv1_556273_AA1759750	Ta.LEA
129	TRIAE_CS42_7DL_TGACv1_605451_AA2006630	Ta.LEA
130	TRIAE_CS42_3AS_TGACv1_212779_AA0703340	Ta.LEA
131	TRIAE_CS42_3DS_TGACv1_273170_AA0929130	Ta.LEA
132	TRIAE_CS42_3B_TGACv1_221163_AA0732400	Ta.LEA
133	TGACv1_scaffold_499495_6BL:46167-48702	Ta.LEA
134	TRIAE_CS42_6BL_TGACv1_503207_AA1627530	Ta.Dhn
135	TRIAE_CS42_6DL_TGACv1_526795_AA1692050	Ta.Dhn
136	TRIAE_CS42_6AL_TGACv1_473324_AA1530170	Ta.Dhn
137	TRIAE_CS42_6DL_TGACv1_527031_AA1697450	Ta.Dhn
138	TRIAE_CS42_7AL_TGACv1_556589_AA1766430	Ta.Dhn
139	TRIAE_CS42_6AL_TGACv1_471708_AA1513200	Ta.Dhn
140	TRIAE_CS42_6DL_TGACv1_526490_AA1685160	Ta.Dhn
141	TRIAE_CS42_3AL_TGACv1_195540_AA0650890	Ta.P5CS
142	TRIAE_CS42_3B_TGACv1_225182_AA0805900	Ta.P5CS
143	TRIAE_CS42_3DL_TGACv1_250063_AA0861520	Ta.P5CS
144	TRIAE_CS42_1AL_TGACv1_000254_AA0007370	Ta.P5CS
145	TRIAE_CS42_1AL_TGACv1_000254_AA0007380	Ta.P5CS
146	TRIAE_CS42_U_TGACv1_690473_AA2160810	Ta.P5CS
147	TGACv1_scaffold_032531_1BL:30355-32019	Ta.P5CS
148	TGACv1_scaffold_063169_1DL:29319-31014	Ta.P5CS
149	TGACv1_scaffold_032531_1BL:36821-38497	Ta.P5CS
150	TGACv1_scaffold_063169_1DL:23068-24617	Ta.P5CS
151	TRIAE_CS42_2AL_TGACv1_093116_AA0272350	Ta.BADH
152	TRIAE_CS42_2BL_TGACv1_129364_AA0380480	Ta.BADH
153	TRIAE_CS42_2DL_TGACv1_158317_AA0515430	Ta.BADH
154	TRIAE_CS42_6BL_TGACv1_499647_AA1588160	Ta.BADH
155	TRIAE_CS42_7AL_TGACv1_558748_AA1795790	Ta.PRX
156	TRIAE_CS42_7BL_TGACv1_578115_AA1889590	Ta.PRX
157	TRIAE_CS42_1AS_TGACv1_019480_AA0067160	Ta.POX
158	TRIAE_CS42_1DS_TGACv1_080951_AA0255980	Ta.POX
159	TRIAE_CS42_5BL_TGACv1_407940_AA1360540	Ta.POX
160	TRIAE_CS42_1BS_TGACv1_049881_AA0163500	Ta.POX
161	TRIAE_CS42_1DS_TGACv1_080718_AA0252660	Ta.POX
162	TRIAE_CS42_2BS_TGACv1_146143_AA0456620	Ta.POX
163	TRIAE_CS42_1AS_TGACv1_019518_AA0067590	Ta.POX
164	TRIAE_CS42_2DL_TGACv1_160509_AA0551280	Ta.CYP450
165	TRIAE_CS42_5DL_TGACv1_434828_AA1442260	Ta.CYP451
166	TRIAE_CS42_U_TGACv1_643213_AA2129080	Ta.CYP452
167	TGACv1_scaffold_643213_U:19008-19502	Ta.CYP453
168	TRIAE_CS42_3AS_TGACv1_210427_AA0671780	Ta.CYP454
169	TRIAE_CS42_3B_TGACv1_222351_AA0762810	Ta.CYP455
170	TRIAE_CS42_3DS_TGACv1_271619_AA0904070	Ta.CYP456
171	TRIAE_CS42_3DS_TGACv1_271997_AA0912700	Ta.CYP457
172	TGACv1_scaffold_272998_3DS:7663-9907	Ta.CYP458
173	TRIAE_CS42_1DL_TGACv1_063686_AA0229890	Ta.CYP459
174	TRIAE_CS42_7AS_TGACv1_569129_AA1808100	Ta.CYP460
175	TRIAE_CS42_7BS_TGACv1_592678_AA1942960	Ta.CYP461
176	TRIAE_CS42_1AL_TGACv1_002988_AA0046960	Ta.CYP462
177	TRIAE_CS42_1AL_TGACv1_000089_AA0002910	Ta.CYP463
178	TRIAE_CS42_1DL_TGACv1_063579_AA0228810	Ta.CYP464
179	TRIAE_CS42_3AS_TGACv1_211169_AA0686310	Ta.CYP465
180	TRIAE_CS42_3B_TGACv1_221264_AA0735620	Ta.CYP466
181	TRIAE_CS42_3DS_TGACv1_271628_AA0904230	Ta.CYP467
182	TRIAE_CS42_7DL_TGACv1_603549_AA1985580	Ta.CYP468
183	TRIAE_CS42_6AS_TGACv1_486348_AA1560130	Ta.GST
184	TRIAE_CS42_U_TGACv1_646418_AA2146460	Ta.GST
185	TRIAE_CS42_3B_TGACv1_220865_AA0721670	Ta.GST
186	TRIAE_CS42_7DS_TGACv1_624053_AA2058590	Ta.GST
